# Supplementary material for: Prediction of Molecular Initiating Events for Adverse Outcome Pathways Using High-Throughput Identification of Chemical Targets
Source: MDPI journal article supplement (doi:10.3390/toxics11020189), 2023-02-17
Supplement: s1 [file s1]

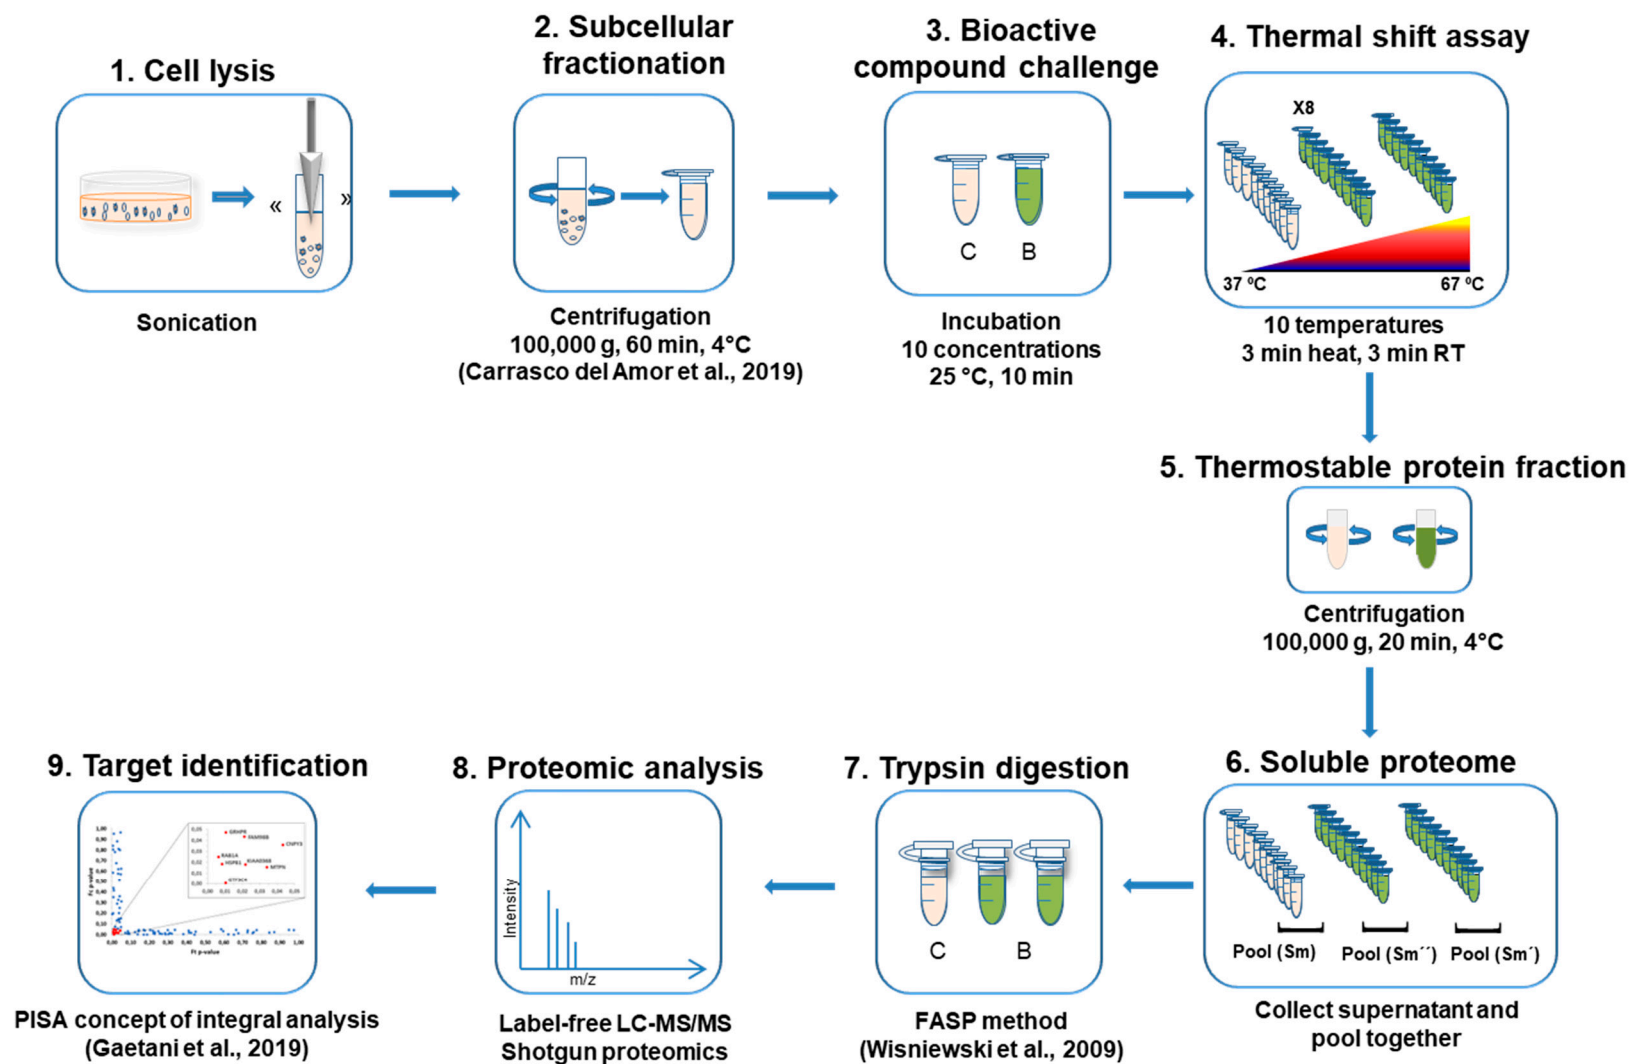

**Figure S1.** Two dimensions proteome integral solubility alteration assay workflow for chemical target identification. Adapted from Lizano-Fallas et al., 2021.

**Table S1.** Database containing the information of each protein target (alternatives) for each criterion.

| Protein name                                  | Protein name abbreviation | Position in Ft (solubility alteration) ranking | Position in Fc p-value ranking | Number of diseases where it is involved | Number of reported negative effects on cells/organs when functionality is absent | Relevance of reported negative effects on cells/organs when functionality is absent                                                                                                                                                                                                                                                                                                 | References   | Number of pathways where it has participation | Relevance of pathways where it has participation                                                                                                                                           | Number of functional and physical protein associations with other protein targets |
|-----------------------------------------------|---------------------------|------------------------------------------------|--------------------------------|-----------------------------------------|----------------------------------------------------------------------------------|-------------------------------------------------------------------------------------------------------------------------------------------------------------------------------------------------------------------------------------------------------------------------------------------------------------------------------------------------------------------------------------|--------------|-----------------------------------------------|--------------------------------------------------------------------------------------------------------------------------------------------------------------------------------------------|-----------------------------------------------------------------------------------|
| General transcription factor 3C polypeptide 4 | GTF3C4                    | 1                                              | 1                              | 0                                       | 0                                                                                | NA                                                                                                                                                                                                                                                                                                                                                                                  | NA           | 1                                             | Gene expression (Transcription): RNA Polymerase III Transcription                                                                                                                          | 0                                                                                 |
| Protein FAM98B                                | FAM98B                    | 2                                              | 7                              | 0                                       | 0                                                                                | NA                                                                                                                                                                                                                                                                                                                                                                                  | NA           | 1                                             | Metabolism of RNA: tRNA processing in the nucleus                                                                                                                                          | 0                                                                                 |
| Heat shock protein beta-1                     | HSPB1                     | 3                                              | 4                              | 2                                       | 10                                                                               | Charcot-Marie-Tooth axonal neuropathy; distal hereditary motor neuropathy; myopathy; reduced antioxidant capacity; decreased cell viability and increased the incidence of UVB-induced apoptosis; negative effect on cell growth in chinese hamster ovary cells; attenuated contractile force in human bladder smooth muscle cells; impact on calcium homeostasis and muscle energy | 36-37, 46-53 | 4                                             | Signal transduction: signaling by VEGF, extra-nuclear estrogen signaling and MAPK6/MAPK4 signaling; metabolism of ARN: regulation of mRNA stability by proteins that bind AU-rich elements | 0                                                                                 |

|                                                  |          |   |   |   |   |                                                                                                                                                                                                                                                                                                                                                                       |       |                                        |                                                                                                                                                                                                                                        |   |
|--------------------------------------------------|----------|---|---|---|---|-----------------------------------------------------------------------------------------------------------------------------------------------------------------------------------------------------------------------------------------------------------------------------------------------------------------------------------------------------------------------|-------|----------------------------------------|----------------------------------------------------------------------------------------------------------------------------------------------------------------------------------------------------------------------------------------|---|
|                                                  |          |   |   |   |   | metabolism;<br>provokes an<br>accumulation of<br>GATA-1 and<br>impairs terminal<br>maturation in<br>CD34+ human cells;<br>ultrastructural<br>abnormalities in the<br>myofibrillar<br>structure in mouse<br>(e.g. destructured<br>myofibrils and<br>higher gaps<br>between<br>myofibrils)                                                                              |       |                                        |                                                                                                                                                                                                                                        |   |
| Ras-related protein Rab-1A                       | RAB1A    | 4 | 5 | 0 | 2 | Synthetic lethal in a<br>haploid human cell<br>line (critical for the<br>survival and/or<br>growth of MDCK<br>cells), Golgi stack<br>and ribbon<br>structures<br>disruption, and<br>endoplasmic<br>reticulum (ER)-to-<br>Golgi trafficking<br>inhibition;<br>perinuclear<br>clustering of early<br>endosomes and<br>delayed transferrin<br>recycling in MDCK<br>cells | 54-55 | 4                                      | Vesicle-mediated<br>transport: COPI-<br>mediated anterograde<br>transport, COPII-<br>mediated vesicle<br>transport and intra-<br>Golgi and retrograde<br>Golgi-to-ER traffic;<br>metabolism of<br>proteins: RAB<br>geranylgeranylation | 2 |
| Myotrophin                                       | MTPN     | 5 | 2 | 0 | 0 | NA                                                                                                                                                                                                                                                                                                                                                                    | NA    | Protein not<br>found in the<br>sources | NA                                                                                                                                                                                                                                     | 1 |
| Proteasome adapter and<br>scaffold protein ECM29 | KIAA0368 | 6 | 3 | 0 | 0 | NA                                                                                                                                                                                                                                                                                                                                                                    | NA    | Protein not<br>found in the<br>sources | NA                                                                                                                                                                                                                                     | 1 |

|                                                |       |   |   |   |   |                                                                 |    |   |                                                                                         |   |
|------------------------------------------------|-------|---|---|---|---|-----------------------------------------------------------------|----|---|-----------------------------------------------------------------------------------------|---|
| Glyoxylate reductase/hydroxypyruvate reductase | GRHPR | 7 | 8 | 1 | 1 | Primary hyperoxaluria type II (PH2)                             | 56 | 1 | Metabolism of aminoacids and derivatives: glyoxylate metabolism and glycine degradation | 0 |
| Protein canopy homolog 3                       | CNPY3 | 8 | 6 | 1 | 1 | Early-onset epileptic encephalopathies, including West syndrome | 57 | 1 | Immune system: trafficking and processing of endosomal TLR                              | 0 |

---

**Table S2.** Pairwise comparison matrices for the alternatives at level 3 of the hierarchy for each criterion and the computed values of local priority vector, principal eigenvalue ( $\lambda_{\max}$ ), consistency index (CI), random consistency index (RI), and consistency ratio (CR) for each matrix.

| Position in Ft<br>(solubility<br>alteration)<br>ranking | GTF3<br>C4 | FAM9<br>8B | HSP<br>B1 | RAB1<br>A | MTP<br>N | KIAA03<br>68 | GRHP<br>R | CNP<br>Y3 | Priori<br>ty<br>vector | Position in Fc p-<br>value ranking                                                                            | GTF3<br>C4 | FAM9<br>8B | HSP<br>B1 | RAB1<br>A | MTP<br>N | KIAA03<br>68 | GRHP<br>R | CNP<br>Y3 | Priori<br>ty<br>vector |
|---------------------------------------------------------|------------|------------|-----------|-----------|----------|--------------|-----------|-----------|------------------------|---------------------------------------------------------------------------------------------------------------|------------|------------|-----------|-----------|----------|--------------|-----------|-----------|------------------------|
| GTF3C4                                                  | 1          | 2          | 3         | 4         | 5        | 6            | 7         | 8         | 0.360                  | GTF3C4                                                                                                        | 1          | 7          | 4         | 5         | 2        | 3            | 8         | 6         | 0.502                  |
| FAM98B                                                  | 1/2        | 1          | 2         | 3         | 4        | 5            | 6         | 7         | 0.259                  | FAM98B                                                                                                        | 1/7        | 1          | 1/4       | 1/3       | 1/6      | 1/5          | 2         | 1/2       | 0.073                  |
| HSPB1                                                   | 1/3        | 1/2        | 1         | 2         | 3        | 4            | 5         | 6         | 0.188                  | HSPB1                                                                                                         | 1/4        | 4          | 1         | 2         | 1/3      | 1/2          | 5         | 3         | 0.247                  |
| RAB1A                                                   | 1/4        | 1/3        | 1/2       | 1         | 2        | 3            | 4         | 5         | 0.135                  | RAB1A                                                                                                         | 1/5        | 3          | 1/2       | 1         | 1/4      | 1/3          | 4         | 2         | 0.183                  |
| MTPN                                                    | 1/5        | 1/4        | 1/3       | 1/2       | 1        | 2            | 3         | 4         | 0.092                  | MTPN                                                                                                          | 1/2        | 6          | 3         | 4         | 1        | 2            | 7         | 5         | 0.400                  |
| KIAA0368                                                | 1/6        | 1/5        | 1/4       | 1/3       | 1/2      | 1            | 2         | 3         | 0.061                  | KIAA0368                                                                                                      | 1/3        | 5          | 2         | 3         | 1/2      | 1            | 6         | 4         | 0.318                  |
| GRHPR                                                   | 1/7        | 1/6        | 1/5       | 1/4       | 1/3      | 1/2          | 1         | 2         | 0.039                  | GRHPR                                                                                                         | 1/8        | 1/2        | 1/5       | 1/4       | 1/7      | 1/6          | 1         | 1/3       | 0.041                  |
| CNPY3                                                   | 1/8        | 1/7        | 1/6       | 1/5       | 1/4      | 1/3          | 1/2       | 1         | 0.026                  | CNPY3                                                                                                         | 1/6        | 2          | 1/3       | 2         | 1/5      | 1/4          | 3         | 1         | 0.134                  |
| $\lambda_{\max}$<br>= 9.563                             |            |            |           |           |          |              |           |           |                        | $\lambda_{\max}$<br>= 8.551                                                                                   |            |            |           |           |          |              |           |           |                        |
| CI = 0.223                                              |            |            |           |           |          |              |           |           |                        | CI = 0.079                                                                                                    |            |            |           |           |          |              |           |           |                        |
| RI = 1.41                                               |            |            |           |           |          |              |           |           |                        | RI = 1.41                                                                                                     |            |            |           |           |          |              |           |           |                        |
| CR = 0.158                                              |            |            |           |           |          |              |           |           |                        | CR = 0.056                                                                                                    |            |            |           |           |          |              |           |           |                        |
| Number of<br>diseases where it<br>is involved           | GTF3<br>C4 | FAM9<br>8B | HSP<br>B1 | RAB1<br>A | MTP<br>N | KIAA03<br>68 | GRHP<br>R | CNP<br>Y3 | Priori<br>ty<br>vector | Number of<br>reported negative<br>effects on<br>cells/organs/organ<br>isms when<br>functionality is<br>absent | GTF3<br>C4 | FAM9<br>8B | HSP<br>B1 | RAB1<br>A | MTP<br>N | KIAA03<br>68 | GRHP<br>R | CNP<br>Y3 | Priori<br>ty<br>vector |
| GTF3C4                                                  | 1          | 1          | 1/9       | 1         | 1        | 1            | 1/7       | 1/7       | 0.102                  | GTF3C4                                                                                                        | 1          | 1          | 1/9       | 1/5       | 1        | 1            | 1/3       | 1/3       | 0.100                  |
| FAM98B                                                  | 1          | 1          | 1/9       | 1         | 1        | 1            | 1/7       | 1/7       | 0.102                  | FAM98B                                                                                                        | 1          | 1          | 1/9       | 1/5       | 1        | 1            | 1/3       | 1/3       | 0.100                  |

|          |   |   |     |   |   |   |     |     |       |
|----------|---|---|-----|---|---|---|-----|-----|-------|
| HSPB1    | 9 | 9 | 1   | 9 | 9 | 9 | 5   | 5   | 0.968 |
| RAB1A    | 1 | 1 | 1/9 | 1 | 1 | 1 | 1/7 | 1/7 | 0.102 |
| MTPN     | 1 | 1 | 1/9 | 1 | 1 | 1 | 1/7 | 1/7 | 0.102 |
| KIAA0368 | 1 | 1 | 1/9 | 1 | 1 | 1 | 1/7 | 1/7 | 0.102 |
| GRHPR    | 7 | 7 | 1/5 | 7 | 7 | 7 | 1   | 1   | 0.708 |
| CNPY3    | 7 | 7 | 1/5 | 7 | 7 | 7 | 1   | 1   | 0.708 |

$$\lambda_{\max} = 8.042 \quad CI = 0.006 \quad RI = 1.41 \quad CR = 0.004$$

|          |   |   |     |     |   |   |     |     |       |
|----------|---|---|-----|-----|---|---|-----|-----|-------|
| HSPB1    | 9 | 9 | 1   | 7   | 9 | 9 | 8   | 8   | 0.853 |
| RAB1A    | 5 | 5 | 1/7 | 1   | 5 | 5 | 3   | 3   | 0.369 |
| MTPN     | 1 | 1 | 1/9 | 1/5 | 1 | 1 | 1/3 | 1/3 | 0.100 |
| KIAA0368 | 1 | 1 | 1/9 | 1/5 | 1 | 1 | 1/3 | 1/3 | 0.173 |
| GRHPR    | 3 | 3 | 1/8 | 1/3 | 3 | 3 | 1   | 1   | 0.297 |
| CNPY3    | 3 | 3 | 1/8 | 1/3 | 3 | 3 | 1   | 1   | 0.297 |

$$\lambda_{\max} = 8.166 \quad CI = 0.024 \quad RI = 1.41 \quad CR = 0.017$$

Relevance of reported negative effects on cells/organs/organs when functionality is absent

Number of pathways where it has participation

|          | GTF3<br>C4 | FAM9<br>8B | HSP<br>B1 | RAB1<br>A | MTP<br>N | KIAA03<br>68 | GRHP<br>R | CNP<br>Y3 | Priori<br>ty<br>vector |          | GTF3<br>C4 | FAM9<br>8B | HSP<br>B1 | RAB1<br>A | MTP<br>N | KIAA03<br>68 | GRHP<br>R | CNP<br>Y3 | Priori<br>ty<br>vector |
|----------|------------|------------|-----------|-----------|----------|--------------|-----------|-----------|------------------------|----------|------------|------------|-----------|-----------|----------|--------------|-----------|-----------|------------------------|
| GTF3C4   | 1          | 1          | 1/9       | 1/5       | 1        | 1            | 1/9       | 1/9       | 0.097                  | GTF3C4   | 1          | 1          | 1/9       | 1/9       | 0        | 0            | 1         | 1         | 0.089                  |
| FAM98B   | 1          | 1          | 1/9       | 1/5       | 1        | 1            | 1/9       | 1/9       | 0.097                  | FAM98B   | 1          | 1          | 1/9       | 1/9       | 0        | 0            | 1         | 1         | 0.089                  |
| HSPB1    | 9          | 9          | 1         | 1/7       | 9        | 9            | 1         | 1         | 0.715                  | HSPB1    | 9          | 9          | 1         | 1         | 0        | 0            | 9         | 9         | 0.801                  |
| RAB1A    | 5          | 5          | 7         | 1         | 5        | 5            | 1/7       | 1/7       | 0.374                  | RAB1A    | 9          | 9          | 1         | 1         | 0        | 0            | 9         | 9         | 0.801                  |
| MTPN     | 1          | 1          | 1/9       | 1/5       | 1        | 1            | 1/9       | 1/9       | 0.097                  | MTPN     | 0          | 0          | 0         | 0         | 1        | 0            | 0         | 0         | 0.015                  |
| KIAA0368 | 1          | 1          | 1/9       | 1/5       | 1        | 1            | 1/9       | 1/9       | 0.097                  | KIAA0368 | 0          | 0          | 0         | 0         | 0        | 1            | 0         | 0         | 0.005                  |
| GRHPR    | 9          | 9          | 1         | 7         | 9        | 9            | 1         | 1         | 0.900                  | GRHPR    | 1          | 1          | 1/9       | 1/9       | 0        | 0            | 1         | 1         | 0.089                  |
| CNPY3    | 9          | 9          | 1         | 7         | 9        | 9            | 1         | 1         | 0.900                  | CNPY3    | 1          | 1          | 1/9       | 1/9       | 0        | 0            | 1         | 1         | 0.089                  |
